# Supplementary material for: Halogenation triggering rules in hybrid materials for fluorescence and dielectric phase transitions
Source: Royal Society of Chemistry journal article supplement (doi:10.1039/d3qi00594a), 2023-01-01
Supplement: d3qi00594a1.pdf [file d3qi00594a1.pdf]

## Supporting Information

# Halogenation triggering rules in hybrids for fluorescence and dielectric phase transitions

*Jun-Qin Wang,<sup>a</sup> Gele Teri,<sup>a</sup> Hao-Fei Ni,<sup>a</sup> Qing-Feng Luo,<sup>a</sup> Xiao-Ping Wang,<sup>a</sup> Da-Wei Fu<sup>\*a</sup>, Yi Zhang<sup>\*a</sup> and Qiang Guo<sup>\*a</sup>*

<sup>a</sup>Institute for Science and Applications of Molecular Ferroelectrics, Key Laboratory of the Ministry of Education for Advanced Catalysis Materials, Zhejiang Normal University, Jinhua, 321004, China

### AUTHOR INFORMATION

#### Corresponding Author

[dawei@zjnu.edu.cn](mailto:dawei@zjnu.edu.cn); [yizhang1980@seu.edu.cn](mailto:yizhang1980@seu.edu.cn); [qiangguo@zjnu.edu.cn](mailto:qiangguo@zjnu.edu.cn).

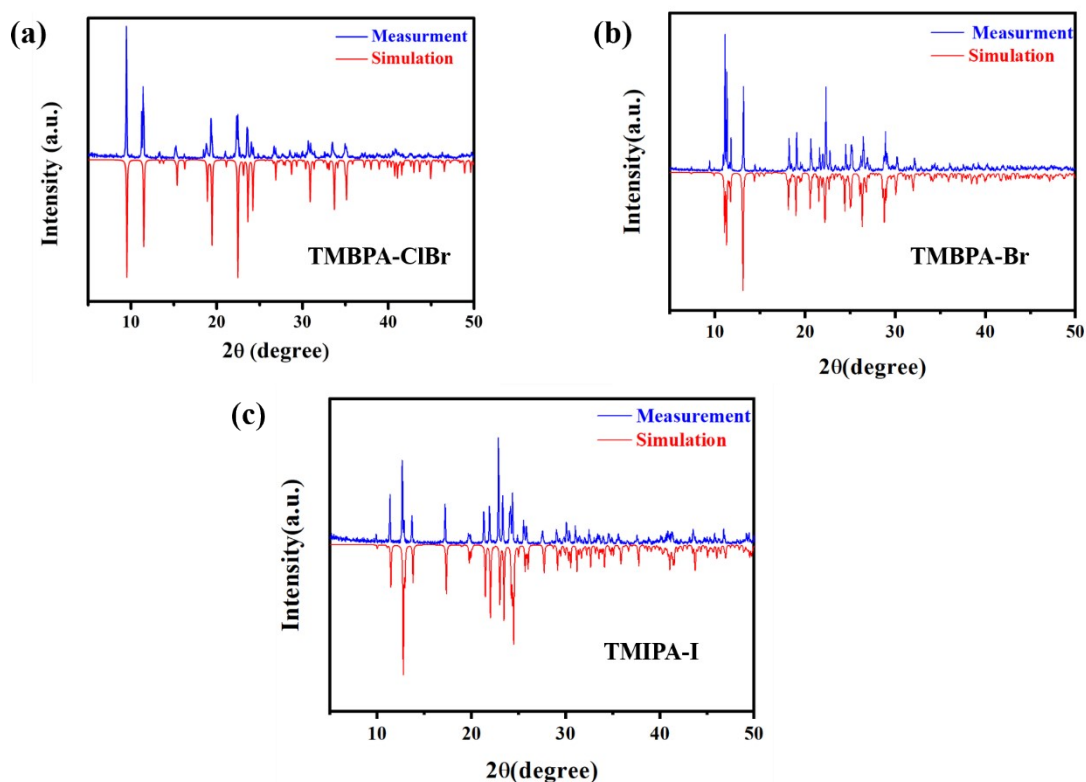

**Figure S1.** PXRD patterns of (a) TMBPA - ClBr, (b) TMBPA - Br, and (c) TMIPA - I at room temperatures.

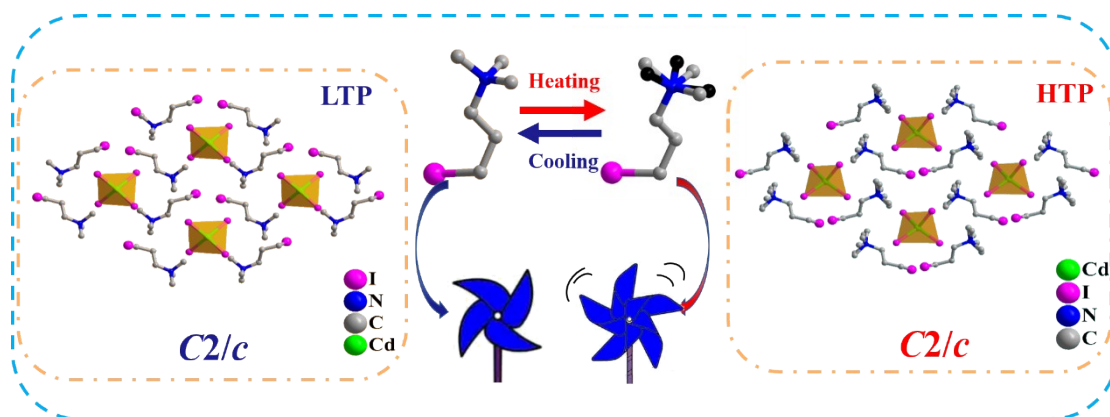

**Figure S2.** The crystal structures (without hydrogen atoms) of TMIPA-I in LTP and HTP.

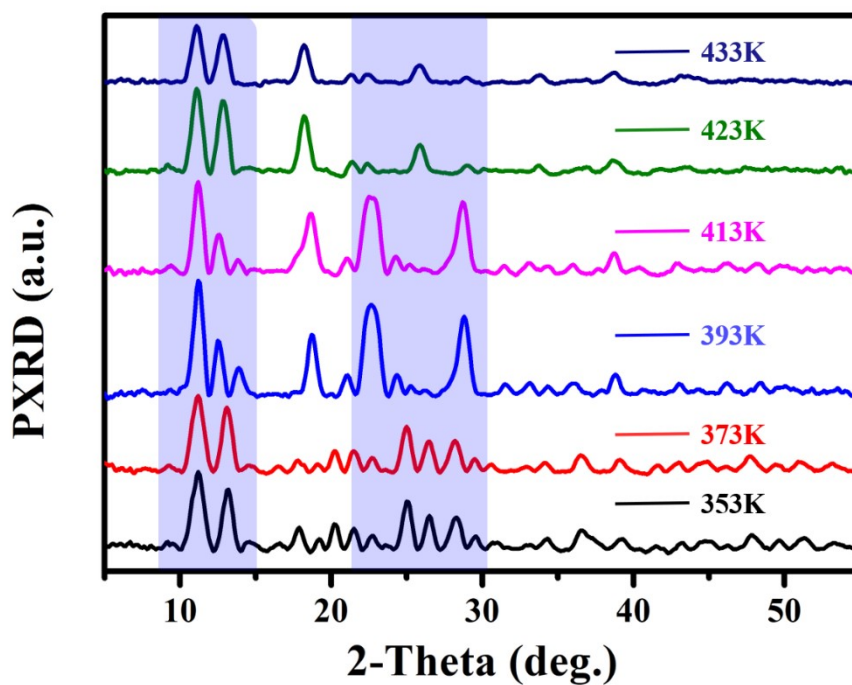

**Figure S3.** Variable-temperature powder X-ray diffraction (PXRD) patterns of TMBPA-Br measured in the temperature range of 353-433 K.

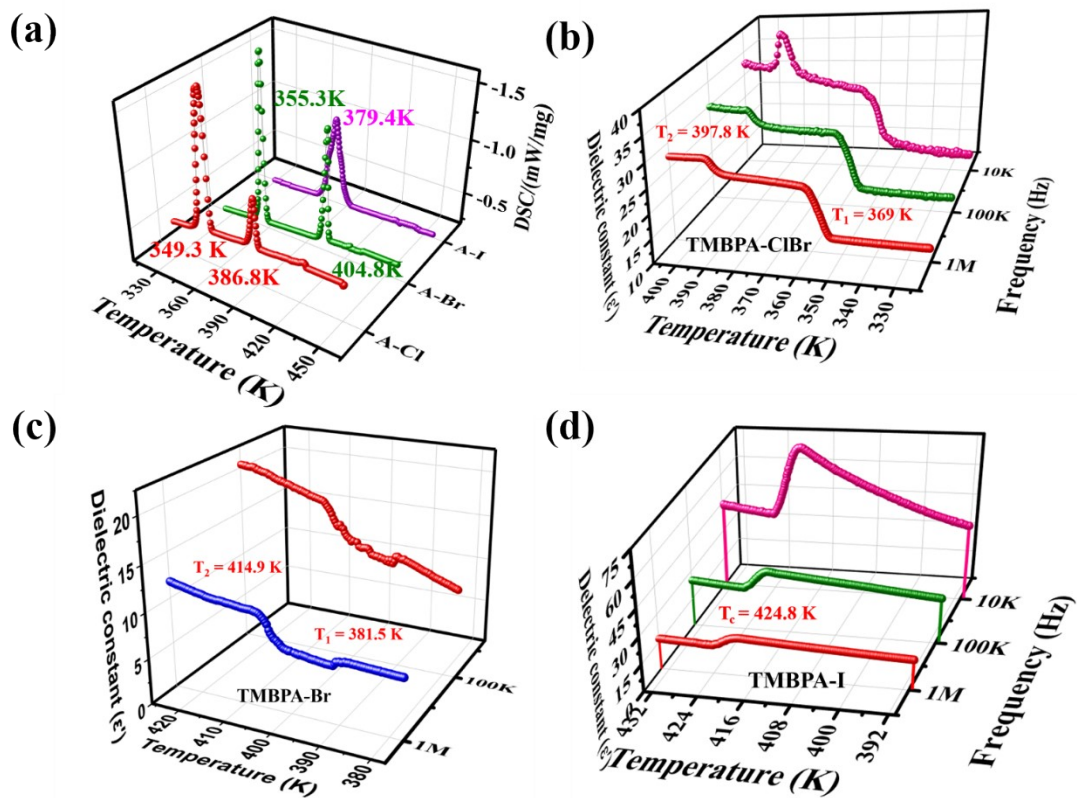

**Figure S4.** (a) DSC curves of TMBPA - ClBr, TMBPA - Br, and TMBPA - I recorded on cooling. Dielectric constant of (b) TMBPA - ClBr, (c) TMBPA - Br, and (d) TMBPA - I recorded at different frequencies.

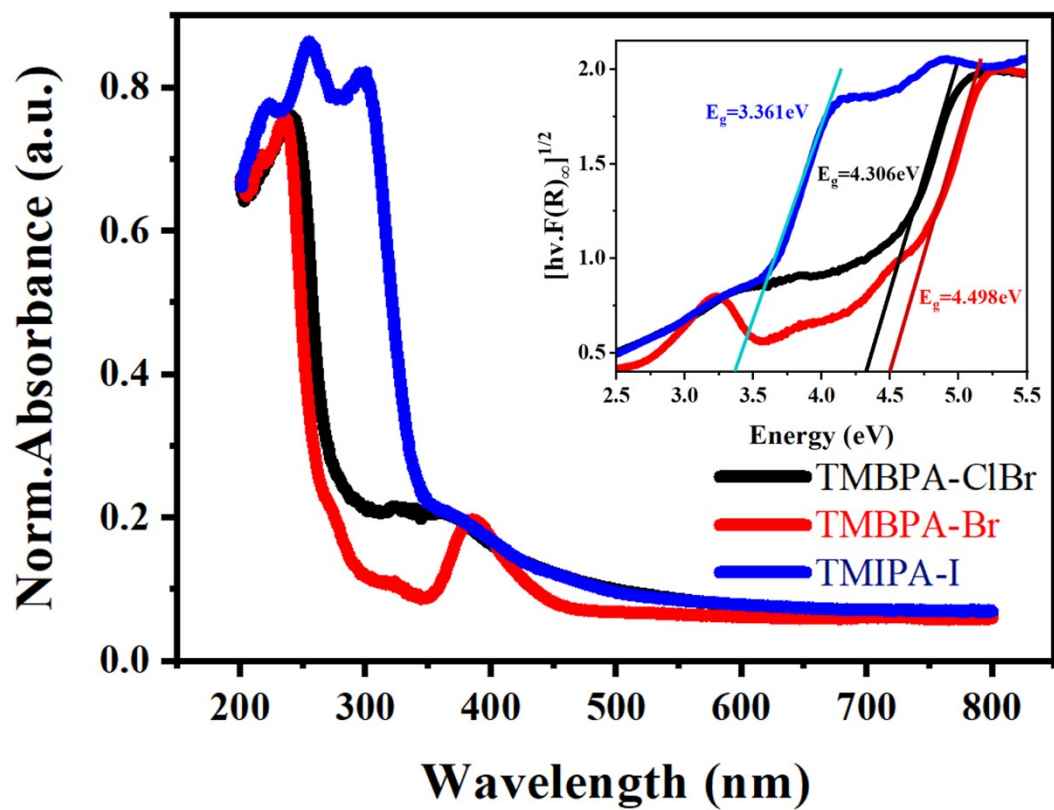

**Figure S5.** Ultraviolet-vis absorption spectrum of compounds. Inset: Tauc plot.

**Table S1.** Crystallographic data and structure refinement details of  
TMBPA–ClBr in high and low temperatures.

| TMBPA-ClBr                                          | LTP                                                                | ITP                                                | HTP                                                |
|-----------------------------------------------------|--------------------------------------------------------------------|----------------------------------------------------|----------------------------------------------------|
| CCDC Code                                           | 2220969                                                            | 2220970                                            | 2220971                                            |
| Formula                                             | C <sub>6</sub> H <sub>15</sub> Br <sub>2</sub> CdCl <sub>2</sub> N | Br <sub>2</sub> C <sub>6</sub> CdCl <sub>2</sub> N | Br <sub>2</sub> C <sub>6</sub> CdCl <sub>2</sub> N |
| Fw                                                  | 444.31                                                             | 429.19                                             | 429.19                                             |
| Temperature                                         | 295 K                                                              | 385.15 K                                           | 405.15 K                                           |
| Crystal Syst                                        | Orthorhombic                                                       | Orthorhombic                                       | Orthorhombic                                       |
| Space group                                         | <i>Pnma</i>                                                        | <i>Cmcm</i>                                        | <i>Cmcm</i>                                        |
| <i>a</i> (Å)                                        | 11.635(3)                                                          | 15.411(14)                                         | 15.479(5)                                          |
| <i>b</i> (Å)                                        | 7.3428(14)                                                         | 11.677(9)                                          | 11.741(3)                                          |
| <i>c</i> (Å)                                        | 15.379(4)                                                          | 7.365(7)                                           | 7.402(2)                                           |
| $\alpha$ /°                                         | 90                                                                 | 90                                                 | 90                                                 |
| $\beta$ /°                                          | 90                                                                 | 90                                                 | 90                                                 |
| $\gamma$ /°                                         | 90                                                                 | 90                                                 | 90                                                 |
| <i>V</i> (Å <sup>3</sup> )                          | 1314.0(5)                                                          | 1325(2)                                            | 1345.2(7)                                          |
| Z                                                   | 4                                                                  | 4                                                  | 4                                                  |
| $\mu$ (mm <sup>-1</sup> )                           | 8.108                                                              | 8.035                                              | 7.917                                              |
| GOF on F <sup>2</sup>                               | 1.052                                                              | 1.194                                              | 1.250                                              |
| <i>R</i> <sub>1</sub> [[ <i>I</i> > 2σ( <i>I</i> )] | 0.0668                                                             | 0.1080                                             | 0.0981                                             |
| <i>wR</i> <sub>2</sub> (all data)                   | 0.2261                                                             | 0.2650                                             | 0.2398                                             |

**Table S2.** Crystallographic data and structure refinement details of  
TMBPA-Br in high and low temperatures.

| TMBPA - Br                                          | LTP                                                                              | ITP                                                              |
|-----------------------------------------------------|----------------------------------------------------------------------------------|------------------------------------------------------------------|
| CCDC Code                                           | 2220972                                                                          | 2220973                                                          |
| Formula                                             | C <sub>18</sub> H <sub>45</sub> Br <sub>9</sub> Cd <sub>1.5</sub> N <sub>3</sub> | C <sub>12</sub> H <sub>30</sub> Br <sub>6</sub> CdN <sub>2</sub> |
| Fw                                                  | 1191.36                                                                          | 794.24                                                           |
| Temperature                                         | 288 K                                                                            | 385.15 K                                                         |
| Crystal Syst                                        | Monoclinic                                                                       | Monoclinic                                                       |
| Space group                                         | <i>P2/c</i>                                                                      | <i>C2/c</i>                                                      |
| <i>a</i> (Å)                                        | 24.015(7)                                                                        | 33.148(18)                                                       |
| <i>b</i> (Å)                                        | 9.642(3)                                                                         | 9.669(6)                                                         |
| <i>c</i> (Å)                                        | 16.046(4)                                                                        | 15.960(8)                                                        |
| $\alpha$ /°                                         | 90                                                                               | 90                                                               |
| $\beta$ /°                                          | 91.474(5)                                                                        | 96.244(9)                                                        |
| $\gamma$ /°                                         | 90                                                                               | 90                                                               |
| <i>V</i> (Å <sup>3</sup> )                          | 3714.4(18)                                                                       | 5085(5)                                                          |
| <i>Z</i>                                            | 4                                                                                | 4                                                                |
| $\mu$ (mm <sup>-1</sup> )                           | 10.560                                                                           | 10.286                                                           |
| GOF on F <sup>2</sup>                               | 1.008                                                                            | 0.989                                                            |
| <i>R</i> <sub>1</sub> [[ <i>I</i> > 2σ( <i>I</i> )] | 0.0408                                                                           | 0.0785                                                           |
| <i>wR</i> <sub>2</sub> (all data)                   | 0.1013                                                                           | 0.2746                                                           |

**Table S3.** Crystallographic data and structure refinement details of  
TMIPA-I in high and low temperatures.

| TMIPA - I                                           | LTP                                                             | HTP                                                             |
|-----------------------------------------------------|-----------------------------------------------------------------|-----------------------------------------------------------------|
| CCDC Code                                           | 2220974                                                         | 2220975                                                         |
| Formula                                             | C <sub>12</sub> H <sub>30</sub> CdI <sub>6</sub> N <sub>2</sub> | C <sub>12</sub> H <sub>30</sub> CdI <sub>6</sub> N <sub>2</sub> |
| Fw                                                  | 1076.18                                                         | 1076.18                                                         |
| Temperature                                         | 223 K                                                           | 427 K                                                           |
| Crystal Syst                                        | Monoclinic                                                      | Monoclinic                                                      |
| Space group                                         | <i>C2/c</i>                                                     | <i>C2/c</i>                                                     |
| <i>a</i> (Å)                                        | 16.090(2)                                                       | 16.423(5)                                                       |
| <i>b</i> (Å)                                        | 9.3746(12)                                                      | 9.478(2)                                                        |
| <i>c</i> (Å)                                        | 18.4146(19)                                                     | 18.835(5)                                                       |
| $\alpha$ /°                                         | 90                                                              | 90                                                              |
| $\beta$ /°                                          | 106.203(6)                                                      | 106.070(5)                                                      |
| $\gamma$ /°                                         | 90                                                              | 90                                                              |
| <i>V</i> (Å <sup>3</sup> )                          | 2667.3(6)                                                       | 2817.3(13)                                                      |
| <i>Z</i>                                            | 4                                                               | 4                                                               |
| $\mu$ (mm <sup>-1</sup> )                           | 7.762                                                           | 7.348                                                           |
| GOF on F <sup>2</sup>                               | 1.070                                                           | 1.044                                                           |
| <i>R</i> <sub>1</sub> [[ <i>I</i> > 2σ( <i>I</i> )] | 0.0231                                                          | 0.0484                                                          |
| <i>wR</i> <sub>2</sub> (all data)                   | 0.0484                                                          | 0.1676                                                          |

**Table S4.** The key bond distances (Å) of TMBPA-ClBr at 288 K, 385.15 K and 405.15 K.

| Temperature | Bond distances [Å] |            |          |           |
|-------------|--------------------|------------|----------|-----------|
| 288 K       | Cd1-Br2            | 2.5581(16) | N1-C3    | 1.463(14) |
|             | Cd1-Cl1            | 2.6151(13) | N1-C2    | 1.476(19) |
|             | Cd1-Cl11           | 2.6151(13) | N1-C24   | 1.476(19) |
|             | Cd1-Cl12           | 2.6397(13) | N1-C1    | 1.512(11) |
|             | Cd1-Cl13           | 2.6397(13) | N1-C14   | 1.512(11) |
|             | Br1-C6             | 1.927(10)  | C4-C5    | 1.507(12) |
|             | N1-C4              | 1.455(12)  | C6-C5    | 1.500(12) |
| 385.15 K    | Br1-C2             | 1.509(10)  | Cd1-Br2  | 2.524(7)  |
|             | Br1-C4             | 1.466(10)  | Cd1-Cl1  | 2.636(4)  |
|             | Br1-C31            | 1.476(10)  | Cd1-Cl12 | 2.636(4)  |
|             | Br1-C3             | 1.476(10)  | Cd1-Cl13 | 2.636(4)  |
|             | C2 - C1            | 1.565(10)  | Cd1-Cl14 | 2.636(4)  |
| 405.15 K    | Br1-C1             | 1.475(10)  | C4-C5    | 1.543(9)  |
|             | Br1-C11            | 1.475(10)  | Br2-Cd1  | 2.538(5)  |
|             | Br1-C2             | 1.467(9)   | Cd1-Cl1  | 2.649(3)  |
|             | Br1-C3             | 1.472(9)   | Cd1-Cl12 | 2.649(3)  |
|             | Br1-C31            | 1.472(9)   | Cd1-Cl13 | 2.649(3)  |
|             | Br1-C4             | 1.898(16)  | Cd1-Cl14 | 2.649(3)  |
|             | C1-C11             | 2.03(3)    |          |           |



**Table S5.** The key bond distances (Å) of TMBPA-Br at 288 K and 383 K.

| Temperature | Bond distances [Å] |            |           |           |
|-------------|--------------------|------------|-----------|-----------|
| 288 K       | Cd2-Br10           | 2.6102(10) | N1-C1     | 1.509(8)  |
|             | Cd2-Br101          | 2.6102(10) | N1-C3     | 1.493(9)  |
|             | Cd2-Br81           | 2.5653(10) | N1-C4     | 1.532(10) |
|             | Cd2-Br8            | 2.5654(10) | N1-C2     | 1.493(9)  |
|             | Cd1-Br7            | 2.6193(11) | N2-C10    | 1.521(9)  |
|             | Cd1-Br6            | 2.6001(11) | N2-C9     | 1.502(9)  |
|             | Cd1-Br5            | 2.5758(11) | N2-C8     | 1.514(10) |
|             | Cd1-Br4            | 2.5728(11) | N2-C7     | 1.461(11) |
|             | Br2-C12            | 1.933(8)   | C10-C11   | 1.498(10) |
|             | Br9-C6             | 1.950(8)   | C11-C12   | 1.519(10) |
|             | Br3-C18            | 1.927(10)  | C16-C17   | 1.502(11) |
|             | N3-C16             | 1.520(9)   | C4-C5     | 1.497(11) |
|             | N3-C15             | 1.498(9)   | C6-C5     | 1.495(11) |
|             | N3-C14             | 1.480(10)  | C17-C18   | 1.521(12) |
|             | N3-C13             | 1.506(10)  |           |           |
| 383 K       | Cd1-Br5            | 2.624(2)   | N1-C5     | 1.48(3)   |
|             | Cd1-Br7            | 2.601(2)   | C1-C10    | 1.537(9)  |
|             | Cd1-Br6            | 2.580(3)   | C1-C3     | 1.538(19) |
|             | Cd1-Br8            | 2.576(3)   | C10-C12   | 1.535(9)  |
|             | Br4-C12            | 1.949(10)  | Br2-C11   | 1.844(9)  |
|             | N2-C1              | 1.50(2)    | C9-C5     | 1.559(7)  |
|             | N2-C4              | 1.49(2)    | C9-C11    | 1.560(7)  |
|             | N2-C6              | 1.47(2)    | C5-C7     | 1.596(16) |
|             | N2-C8              | 1.51(2)    | C3-C13    | 1.537(19) |
|             | N1-C14             | 1.46(3)    | C13-Br3   | 1.951(10) |
|             | N1-C16             | 1.44(3)    | C7-C15    | 1.630(15) |
| N1-C2       | 1.47(3)            | C15-Br1    | 1.655(15) |           |

**Table S6.** The key bond distances (Å) of TMIPA-I at 223 K and 427 K.

| Temperature | Bond distances [Å] |           |        |           |
|-------------|--------------------|-----------|--------|-----------|
| 223 K       | I1-C6              | 2.161(3)  | C4-C5  | 1.517(4)  |
|             | N1-C4              | 1.509(4)  | C5-C6  | 1.515(5)  |
|             | N1-C2              | 1.498(4)  | I3-Cd1 | 2.7744(3) |
|             | N1-C1              | 1.502(4)  | I2-Cd1 | 2.7934(4) |
|             | N1C3               | 1.489(5)  |        |           |
| 427 K       | Cd1-I3             | 2.7932(9) | N1-C6  | 1.503(16) |
|             | Cd1-I31            | 2.7932(9) | N1-C4  | 1.513(12) |
|             | Cd1-I2             | 2.7702(9) | N1-C7  | 1.496(12) |
|             | Cd1-I21            | 2.7702(9) | N1-C5  | 1.502(15) |
|             | I1-C1              | 2.098(11) | N1-C8  | 1.500(15) |
|             | N1-C3              | 1.558(12) | C3-C2  | 1.468(13) |
|             | N1-C9              | 1.494(12) | C2-C1  | 1.517(16) |

**Table S7.** The key angles (°) of TMBPA-ClBr at 288 K, 385.15 K and

## 405.15 K.

| Temperature | angles (°)    |              |               |            |
|-------------|---------------|--------------|---------------|------------|
| 295 K       | Br2-Cd1-Cl1   | 107.03(4)    | C4-N1-C14     | 108.8(7)   |
|             | Br2-Cd1-Cl11  | 107.03(4)    | C4-N1-C1      | 108.8(7)   |
|             | Br2-Cd1-Cl12  | 105.39(4)    | C3-N1-C24     | 119.5(17)  |
|             | Br2-Cd1-Cl13  | 105.39(4)    | C3-N1-C2      | 119.5(17)  |
|             | Cl11-Cd1-Cl12 | 82.38(5)     | C3-N1-C14     | 105.4(8)   |
|             | Cl11-Cd1-Cl13 | 147.54(3)    | C3-N1-C1      | 105.4(8)   |
|             | Cl12-Cd1-Cl13 | 87.59(6)     | C24-N1-C2     | 37(4)      |
|             | Cl1-Cd1-Cl12  | 147.54(3)    | C24-N1-C14    | 39.9(15)   |
|             | Cl1-Cd1-Cl11  | 89.72(6)     | C2-N1-C14     | 76(2)      |
|             | Cl1-Cd1-Cl13  | 82.38(5)     | C14-N1-C1     | 116.4(16)  |
|             | Cd1-Cl1-Cd13  | 97.62(5)     | N1-C4-C5      | 118.4(7)   |
|             | C4-N1-C3      | 112.0(8)     | C5-C6-Br1     | 112.4(7)   |
|             | C4-N1-C2      | 124.6(17)    | C6-C5-C4      | 108.6(9)   |
|             | C4-N1-C24     | 124.6(17)    |               |            |
| 385.15 K    | C4-Br1-C2     | 99(4)        | Br2-Cd1-Cl14  | 106.24(6)  |
|             | C4-Br1-C3     | 134(2)       | Br2-Cd1-Cl15  | 106.24(6)  |
|             | C4-Br1-C31    | 134(2)       | Cl13-Cd1-Cl14 | 88.59(15)  |
|             | C3-Br1-C2     | 88.5(11)     | Cl13-Cd1-Cl1  | 147.53(11) |
|             | C31-Br1-C2    | 88.5(11)     | Cl15-Cd1-Cl1  | 88.59(15)  |
|             | C3-Br1-C31    | 91(5)        | Cl14-Cd1-Cl1  | 82.42(17)  |
|             | Br1-C2-C1     | 146.2(19)    | Cl13-Cd1-Cl15 | 82.42(17)  |
|             | C22-C1-C2     | 152(4)       | Cl15-Cd1-Cl14 | 147.53(11) |
|             | Br2-Cd1-Cl13  | 106.24(6)    | Cd1-Cl1-Cd14  | 97.58(17)  |
|             | Br2-Cd1-Cl1   | 106.24(6)    |               |            |
|             | C1-Br1-Cl11   | 87.1(18)     | C5-C4-Br1     | 117.9(10)  |
|             | C11-Br1-C4    | 89.9(14)     | C42-C5-C4     | 109.6(16)  |
|             | C1-Br1-C4     | 89.9(14)     | Br2-Cd1-Cl1   | 106.23(4)  |
|             | C2-Br1-C1     | 136.4(9)     | Br2-Cd1-Cl13  | 106.23(4)  |
| C2-Br1-C11  | 136.4(9)      | Br2-Cd1-Cl14 | 106.23(4)     |            |
| C2-Br1-C3   | 109.0(14)     | Br2-Cd1-Cl15 | 106.23(4)     |            |
| 405.15 K    | C2-Br1-C31    | 109.0(14)    | Cl14-Cd1-Cl13 | 82.41(13)  |
|             | C2-Br1-C4     | 92.7(11)     | Cl13-Cd1-Cl1  | 88.62(11)  |
|             | C3-Br1-C4     | 75.9(9)      | Cl15-Cd1-Cl1  | 82.41(13)  |
|             | C31-Br1-C4    | 75.9(9)      | Cl14-Cd1-Cl1  | 147.55(9)  |
|             | Br1-C1-C1     | 46.4(9)      | Cd15-Cl1-Cd1  | 97.58(13)  |
|             |               |              |               |            |

Table S8. The key angles (°) of TMBPA-Br at 288 K and 383 K.

| Temperature | angles (°)     |            |             |           |
|-------------|----------------|------------|-------------|-----------|
| 288 K       | Br10-Cd2-Br101 | 106.48(5)  | C3-N1-C4    | 113.0(6)  |
|             | Br81-Cd2-Br101 | 109.95(3)  | C2-N1-C1    | 108.7(6)  |
|             | Br8-Cd2-Br10   | 109.95(3)  | C2-N1-C3    | 109.3(6)  |
|             | Br8-Cd2-Br101  | 103.01(4)  | C2-N1-C4    | 105.8(6)  |
|             | Br81-Cd2-Br10  | 103.01(4)  | C9-N2-C10   | 111.0(6)  |
|             | Br81-Cd2-Br8   | 123.52(5)  | C9-N2-C8    | 108.4(6)  |
|             | Br6-Cd1-Br7    | 106.76(4)  | C8-N2-C10   | 107.6(6)  |
|             | Br5-Cd1-Br7    | 107.71(4)  | C7-N2-C10   | 111.5(6)  |
|             | Br5-Cd1-Br6    | 109.90(4)  | C7-N2-C9    | 109.3(7)  |
|             | Br4-Cd1-Br7    | 105.66(4)  | C7-N2-C8    | 109.0(7)  |
|             | Br4-Cd1-Br6    | 110.06(4)  | C11-C10-N2  | 116.2(6)  |
|             | Br4-Cd1-Br5    | 116.23(4)  | C10-C11-C12 | 108.6(6)  |
|             | C15-N3-C16     | 110.3(6)   | C17-C16-N3  | 115.5(7)  |
|             | C15-N3-C13     | 108.6(6)   | C5-C4-N1    | 115.9(7)  |
|             | C14-N3-C16     | 112.2(6)   | C11-C12-Br2 | 112.3(5)  |
|             | C14-N3-C15     | 110.1(6)   | C5-C6-Br9   | 114.3(6)  |
|             | C14-N3-C13     | 107.9(6)   | C6-C5-C4    | 112.9(7)  |
|             | C13-N3-C16     | 107.5(6)   | C16-C17-C18 | 114.2(8)  |
|             | C1-N1-C4       | 110.5(6)   | C17-C18-Br3 | 112.3(7)  |
|             | C3-N1-C1       | 109.3(6)   |             |           |
| 383 K       | Br7-Cd1-Br5    | 106.33(9)  | C16-N1-C2   | 109(2)    |
|             | Br6-Cd1-Br5    | 106.21(9)  | C16-N1-C5   | 112(2)    |
|             | Br6-Cd1-Br7    | 108.13(9)  | C2-N1-C5    | 98(2)     |
|             | Br8-Cd1-Br5    | 104.30(10) | N2-C1-C10   | 115.9(17) |
|             | Br8-Cd1-Br7    | 109.78(10) | N2-C1-C     | 119(7)    |
|             | Br8-Cd1-Br6    | 121.08(11) | C12-C10-C1  | 112.0(19) |
|             | C1-N2-C8       | 109.2(15)  | C10-C12-Br4 | 110.6(14) |
|             | C4-N2-C1       | 113.7(15)  | C5-C9-C11   | 84(4)     |
|             | C4-N2-C8       | 110.2(16)  | N1-C5-C9    | 117(3)    |
|             | C6-N2-C1       | 108.3(15)  | N1-C5-C7    | 110(2)    |
|             | C6-N2-C4       | 110.0(15)  | C9-C11-Br2  | 111(5)    |
|             | C6-N2-C8       | 105.1(15)  | C13-C3-C1   | 132(10)   |
|             | C14-N1-C2      | 110(2)     | C3-C13-Br3  | 103(10)   |
|             | C14-N1-C5      | 112(2)     | C5-C7-C15   | 105.8(19) |
|             | C16-N1-C14     | 115(2)     | C7-C15-Br1  | 116.0(18) |

**Table S9. The key angles (°) of TMIPA-I at 223 K and 427 K.**

| Temperature | angles (°)  |           |             |             |
|-------------|-------------|-----------|-------------|-------------|
| 223 K       | C2-N1-C4    | 108.4(2)  | C5-C6-I1    | 113.7(2)    |
|             | C2-N1-C1    | 107.7(3)  | I3-Cd1-I31  | 112.378(17) |
|             | C1-N1-C4    | 111.4(3)  | I3-Cd1-I21  | 107.748(11) |
|             | C3-N1-C4    | 110.4(3)  | I31-Cd1-I21 | 109.370(10) |
|             | C3-N1-C2    | 108.5(3)  | I3-Cd1-I2   | 109.370(10) |
|             | C3-N1-C1    | 110.4(3)  | I31-Cd1-I2  | 107.748(11) |
|             | N1-C4-C5    | 115.6(3)  | I21-Cd1-I2  | 110.230(17) |
|             | C6-C5-C4    | 111.7(3)  |             |             |
| 427 K       | I3-Cd1-I31  | 110.62(4) | C4-N1-C3    | 110.9(11)   |
|             | I2-Cd1-I3   | 107.87(3) | C7-N1-C3    | 111.0(10)   |
|             | I21-Cd1-I31 | 107.87(3) | C7-N1-C5    | 97(2)       |
|             | I2-Cd1-I31  | 108.42(3) | C7-N1-C8    | 87(2)       |
|             | I21-Cd1-I3  | 108.42(3) | C5-N1-C3    | 112.6(19)   |
|             | I2-Cd1-I21  | 113.65(5) | C8-N1-C3    | 109(2)      |
|             | C9-N1-C3    | 103.8(10) | C8-N1-C5    | 133(3)      |
|             | C9-N1-C6    | 135(4)    | C2-C3-N1    | 117.6(8)    |
|             | C9-N1-C4    | 96.0(17)  | C3-C2-C1    | 112.9(10)   |
|             | C6-N1-C3    | 109(3)    | C2-C1-I1    | 116.3(8)    |
|             | C6-N1-C4    | 100(4)    |             |             |
